# Supplementary material for: Water vapor stable isotope memory effects of common tubing materials
Source: Copernicus journal article supplement (doi:10.5194/amt-2023-56), 2023-05-08
Supplement: Supplementary file 1 [file amt-2023-56-supplement.pdf]

## S1. Experimental Data

**Table S1.** Summary of experimental conditions.  $\delta D$  and  $\delta^{18}O$  and  $[H_2O_v]$  were calculated using the average of measurements between 1800-2000 seconds after switching. Deuterium-excess was calculated using the average of measurements between 3400-3600s after switching because it took d-excess longer to equilibrate. The row “WVISS mV” gives the WVISS voltage setting used to achieve the WVISS  $[H_2O_v]$  in that experiment.

| Tubing Type                                              | Teflon (PTFE) long                                                                          |                            | Copper                                                                                                   |                            | HDPE                                                                                                                                    |                            | PFA                                                                  |                            | FEP (Thin-walled)                                                            |                            | FEP (Thick-walled)                                                                            |                            | Thin-walled short PTFE                       | Thick-walled short PTFE                                                                                | No filter long PTFE                          | No filter short PTFE                         |
|----------------------------------------------------------|---------------------------------------------------------------------------------------------|----------------------------|----------------------------------------------------------------------------------------------------------|----------------------------|-----------------------------------------------------------------------------------------------------------------------------------------|----------------------------|----------------------------------------------------------------------|----------------------------|------------------------------------------------------------------------------|----------------------------|-----------------------------------------------------------------------------------------------|----------------------------|----------------------------------------------|--------------------------------------------------------------------------------------------------------|----------------------------------------------|----------------------------------------------|
| Tubing Information                                       | Advanced Technology Products $3/16$ inch ID x $1/4$ inch OD 100 foot length (PTFE-0304X100) |                            | McMaster-Carr cleaned and capped $1/8$ inch Tube Size, $1/4$ inch OD, 0.03 inch Wall Thickness (5174K21) |                            | McMaster-Carr High-Pressure/Vacuum Polyethylene Tubing $1/8$ inch ID, $1/4$ inch OD, $1/16$ inch Wall Thickness, White, 100' (50375K41) |                            | Fluorotherm $3/16$ inch ID x $1/4$ inch OD 100 foot length (F015202) |                            | Altoflo LLC $3/16$ inch ID x $1/4$ inch OD 100 foot length (200-0250-030-0C) |                            | McMaster-Carr FEP clear tubing for chemicals $1/8$ inch ID, $1/4$ inch OD 100 foot' (2129T16) |                            | Advanced Technology Products (PTFE-0304X100) | Advanced Technology Products $1/8$ inch ID, $1/4$ inch OD, $1/16$ inch Wall Thickness, (PTFE-0204X100) | Advanced Technology Products (PTFE-0304X100) | Advanced Technology Products (PTFE-0304X100) |
| Date ran                                                 | 07 May 2022 to 08 May 2022                                                                  | 08 May 2022 to 09 May 2022 | 05 May 2022 to 06 May 2022                                                                               | 06 May 2022 to 07 May 2022 | 10 May 2022 to 11 May 2022                                                                                                              | 11 May 2022 to 12 May 2022 | 09 May 2022 to 10 May 2022                                           | 22 May 2022 to 23 May 2022 | 15 May 2022 to 16 May 2022                                                   | 16 May 2022 to 17 May 2022 | 17 May 2022 to 18 May 2022                                                                    | 26 May 2022 to 27 May 2022 | 04 May 2022 to 05 May 2022                   | 23 May 2022 to 24 May 2022                                                                             | 27 May 2022                                  |                                              |
| Temperature (°C)                                         | ~20 °C                                                                                      | ~60 °C                     | ~20 °C                                                                                                   | ~60 °C                     | ~20 °C                                                                                                                                  | ~60 °C                     | ~20 °C                                                               | ~60 °C                     | ~20 °C                                                                       | ~60 °C                     | ~20 °C                                                                                        | ~60 °C                     | ~20 °C                                       | ~20 °C                                                                                                 | ~20 °C                                       | ~20 °C                                       |
| Analyzer air flow speed (L min <sup>-1</sup> )           | ~0.1                                                                                        | ~0.1                       | ~0.1                                                                                                     | ~0.1                       | ~0.1                                                                                                                                    | ~0.1                       | ~0.1                                                                 | ~0.1                       | ~0.1                                                                         | ~0.1                       | ~0.1                                                                                          | ~0.1                       | ~0.1                                         | ~0.1                                                                                                   | ~0.1                                         | ~0.1                                         |
| Replicates (# of enriched-to-depleted $\delta$ switches) | 5                                                                                           | 5                          | 5                                                                                                        | 5                          | 5                                                                                                                                       | 5                          | 5                                                                    | 5                          | 5                                                                            | 5                          | 5                                                                                             | 5                          | 5                                            | 5                                                                                                      | 5                                            | 5                                            |
| Run Length (sec)                                         | 3825                                                                                        | 3825                       | 3825                                                                                                     | 3825                       | 3825                                                                                                                                    | 3825                       | 3825                                                                 | 3825                       | 3825                                                                         | 3825                       | 3825                                                                                          | 3825                       | 3825                                         | 3825                                                                                                   | 3825                                         | 3825                                         |
| WVISS $\delta D$ vapor (‰)                               | -33.26                                                                                      | -34.37                     | -33.14                                                                                                   | -33.58                     | -36.80                                                                                                                                  | -38.97                     | -32.91                                                               | -32.45                     | -34.13                                                                       | -34.31                     | -36.49                                                                                        | -37.47                     | -31.17                                       | -31.63                                                                                                 | -31.17                                       | -30.94                                       |
| WVISS $\delta^{18}O$ vapor (‰)                           | -4.186                                                                                      | -4.014                     | -4.172                                                                                                   | -3.345                     | -3.178                                                                                                                                  | -3.157                     | -3.326                                                               | -2.783                     | -3.899                                                                       | -4.565                     | -4.283                                                                                        | -3.456                     | -2.863                                       | -3.882                                                                                                 | -3.225                                       | -4.310                                       |
| WVISS D-excess vapor (‰)                                 | 1.234                                                                                       | -1.418                     | 0.952                                                                                                    | -6.459                     | -8.934                                                                                                                                  | -10.706                    | -6.286                                                               | -8.731                     | -1.355                                                                       | 3.069                      | -1.551                                                                                        | -6.839                     | -8.278                                       | 1.386                                                                                                  | -2.055                                       | 5.121                                        |
| WVISS mV                                                 | 3.78                                                                                        | 3.9                        | 3.9                                                                                                      | 3.9                        | 4                                                                                                                                       | 4.2                        | 3.9                                                                  | 3.9                        | 4.05                                                                         | 3.97                       | 4                                                                                             | 4                          | 3.85                                         | 3.6                                                                                                    | 4.04                                         | 3.95                                         |
| WVISS $H_2O$ average (ppm)                               | 9149                                                                                        | 8866                       | 8859                                                                                                     | 8835                       | 8745                                                                                                                                    | 8569                       | 8825                                                                 | 9000                       | 8723                                                                         | 8827                       | 8721                                                                                          | 8811                       | 9294                                         | 9472                                                                                                   | 8826                                         | 9274                                         |
| DPG $\delta D$ vapor (‰)                                 | -171.16                                                                                     | -165.77                    | -171.58                                                                                                  | -168.36                    | -171.37                                                                                                                                 | -168.94                    | -169.28                                                              | -169.13                    | -174.34                                                                      | -171.72                    | -172.90                                                                                       | -172.95                    | -169.12                                      | -170.62                                                                                                | -168.30                                      | -166.20                                      |
| DPG $\delta^{18}O$ vapor (‰)                             | -21.785                                                                                     | -21.006                    | -21.984                                                                                                  | -20.678                    | -20.660                                                                                                                                 | -20.123                    | -20.968                                                              | -20.424                    | -22.482                                                                      | -22.669                    | -22.008                                                                                       | -21.200                    | -20.202                                      | -21.273                                                                                                | -21.155                                      | -21.554                                      |
| DPG D-excess (‰)                                         | 1.579                                                                                       | 0.374                      | 1.899                                                                                                    | -4.067                     | -7.369                                                                                                                                  | -9.718                     | -3.519                                                               | -7.740                     | 3.583                                                                        | 8.056                      | 1.003                                                                                         | -5.148                     | -8.918                                       | -2.697                                                                                                 | -0.277                                       | 4.870                                        |
| DPG $H_2O$ average (ppm)                                 | 8888                                                                                        | 8888                       | 8911                                                                                                     | 8915                       | 8429                                                                                                                                    | 8390                       | 8862                                                                 | 8828                       | 8965                                                                         | 8938                       | 8625                                                                                          | 8549                       | 9029                                         | 8843                                                                                                   | 8949                                         | 9175                                         |

**Table S1 continued.**

| Tubing Type                                              | Teflon (PTFE) short                                                                      | Teflon (PTFE) long                                                                                          | Copper                                                                                                                   |
|----------------------------------------------------------|------------------------------------------------------------------------------------------|-------------------------------------------------------------------------------------------------------------|--------------------------------------------------------------------------------------------------------------------------|
| Tubing Information                                       | Advanced Technology Products $\frac{3}{16}$ inch ID x $\frac{1}{4}$ inch (PTFE-0304X100) | Advanced Technology Products $\frac{3}{16}$ inch ID x $\frac{1}{4}$ inch OD 100 foot length (PTFE-0304X100) | McMaster-Carr cleaned and capped $\frac{1}{8}$ inch Tube Size, $\frac{1}{4}$ inch OD, 0.03 inch Wall Thickness (5174K21) |
| Date ran                                                 | 20 Sept 2022 to 21 Sept 2022                                                             | 21 Sept 2022                                                                                                | 03 Oct 2022                                                                                                              |
| Temperature (°C)                                         | ~21 °C                                                                                   | ~21 °C                                                                                                      | ~21 °C                                                                                                                   |
| Analyzer air flow speed (L min <sup>-1</sup> )           | 0.2–0.3                                                                                  | 0.2–0.3                                                                                                     | 0.2–0.3                                                                                                                  |
| Replicates (# of enriched-to-depleted $\delta$ switches) | 4                                                                                        | 5                                                                                                           | 5                                                                                                                        |
| Run Length (sec)                                         | 3825                                                                                     | 3825                                                                                                        | 3825                                                                                                                     |
| WVISS $\delta$ D vapor (‰)                               | -27.44                                                                                   | -27.58                                                                                                      | -27.28                                                                                                                   |
| WVISS $\delta^{18}$ O vapor (‰)                          | -3.465                                                                                   | -4.180                                                                                                      | -1.515                                                                                                                   |
| WVISS D-excess vapor (‰)                                 | 1.095                                                                                    | 5.384                                                                                                       | -14.934                                                                                                                  |
| WVISS mV                                                 | 3.90                                                                                     | 3.91                                                                                                        | 3.85                                                                                                                     |
| WVISS H <sub>2</sub> O average (ppm)                     | 9394                                                                                     | 9553                                                                                                        | 8824                                                                                                                     |
| DPG $\delta$ D vapor (‰)                                 | -180.09                                                                                  | -181.02                                                                                                     | -175.29                                                                                                                  |
| DPG $\delta^{18}$ O vapor (‰)                            | -22.813                                                                                  | -23.184                                                                                                     | -20.293                                                                                                                  |
| DPG D-excess (‰)                                         | 2.473                                                                                    | 4.883                                                                                                       | -11.798                                                                                                                  |
| DPG H <sub>2</sub> O average (ppm)                       | 9249                                                                                     | 9201                                                                                                        | 9016                                                                                                                     |

10 **S2. Allan variation for averaging interval determination**

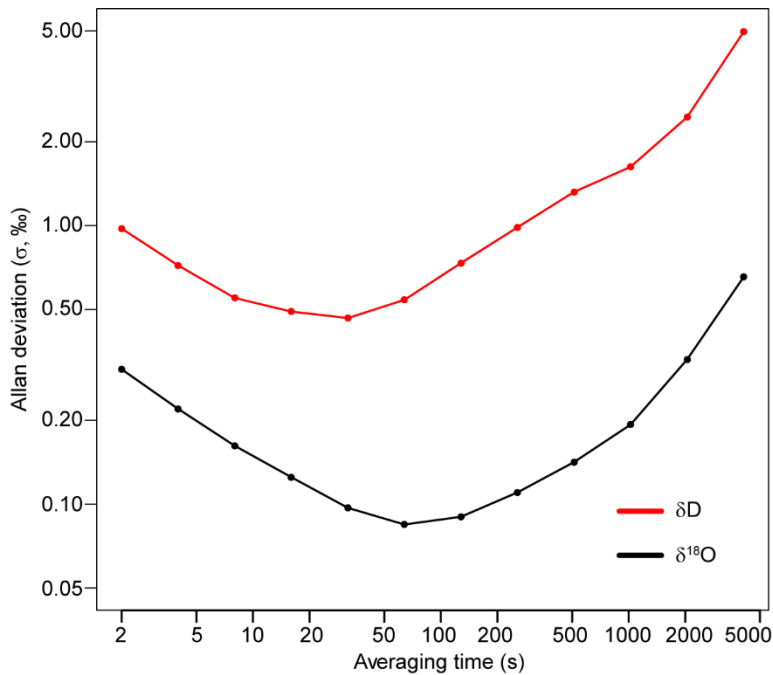

**Figure S1.** Example Allan deviation ( $\sigma$ ) plot for slow analyzer air flow indicates 32 s for  $\delta$ D and 64 s for  $\delta^{18}$ O as the optimal averaging times over 4.5 hours of unchanging DPG-produced vapor for  $\delta$ D (red) and  $\delta^{18}$ O (black). While a longer averaging time is optimal to reduce noise, we chose 20 s averages as a way to reduce noise without excessively smoothing signal changes. Allan variance was calculated using R’s “avar” package (Guerrier et al., 2020).

### S3. Switching test results

While Aemisegger (2012) indicated desorption of enriched isotopes takes longer than desorption of depleted isotopes, our results for both the enriched-to-depleted and depleted-to-enriched switches were similar after accounting for a WVISS purge cycle in the depleted-to-enriched transition.

20

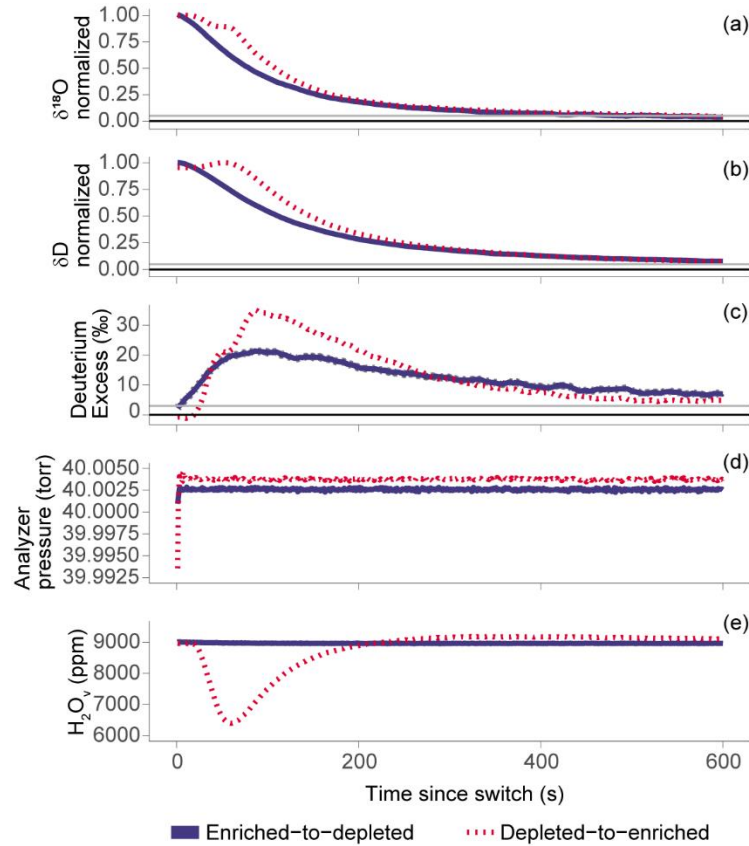

25

**Figure S2.** Averaged enriched-to-depleted and depleted-to-enriched transition results for short, thin-walled PTFE for  $\delta^{18}\text{O}$  (a),  $\delta\text{D}$  (b), D-excess (c), analyzer pressure in torr (d), and water concentration (e) plotted as time since switch. Solid lines indicate the enriched-to-depleted switch, while the dotted-dashed lines indicate the depleted-to-enriched switch. D-excess is adjusted to end at 0‰ for each experiment, and  $\delta\text{D}$  and  $\delta^{18}\text{O}$  are normalized from 0–1. Horizontal lines indicate thresholds of  $y=95\%$  completion for  $\delta\text{D}$  and  $\delta^{18}\text{O}$ , and  $3\%$  for D-excess. There is an isotopic signal artifact created due to a purge cycle when the WVISS initiates, while the transition from the WVISS to the DPG was uninterrupted. Both directions of isotopic switches are similar in terms of  $\delta\text{D}$ ,  $\delta^{18}\text{O}$ , and D-excess metrics. Lag has not been subtracted from these results.

30

**S4. Thin- and thick-walled tubing test results**

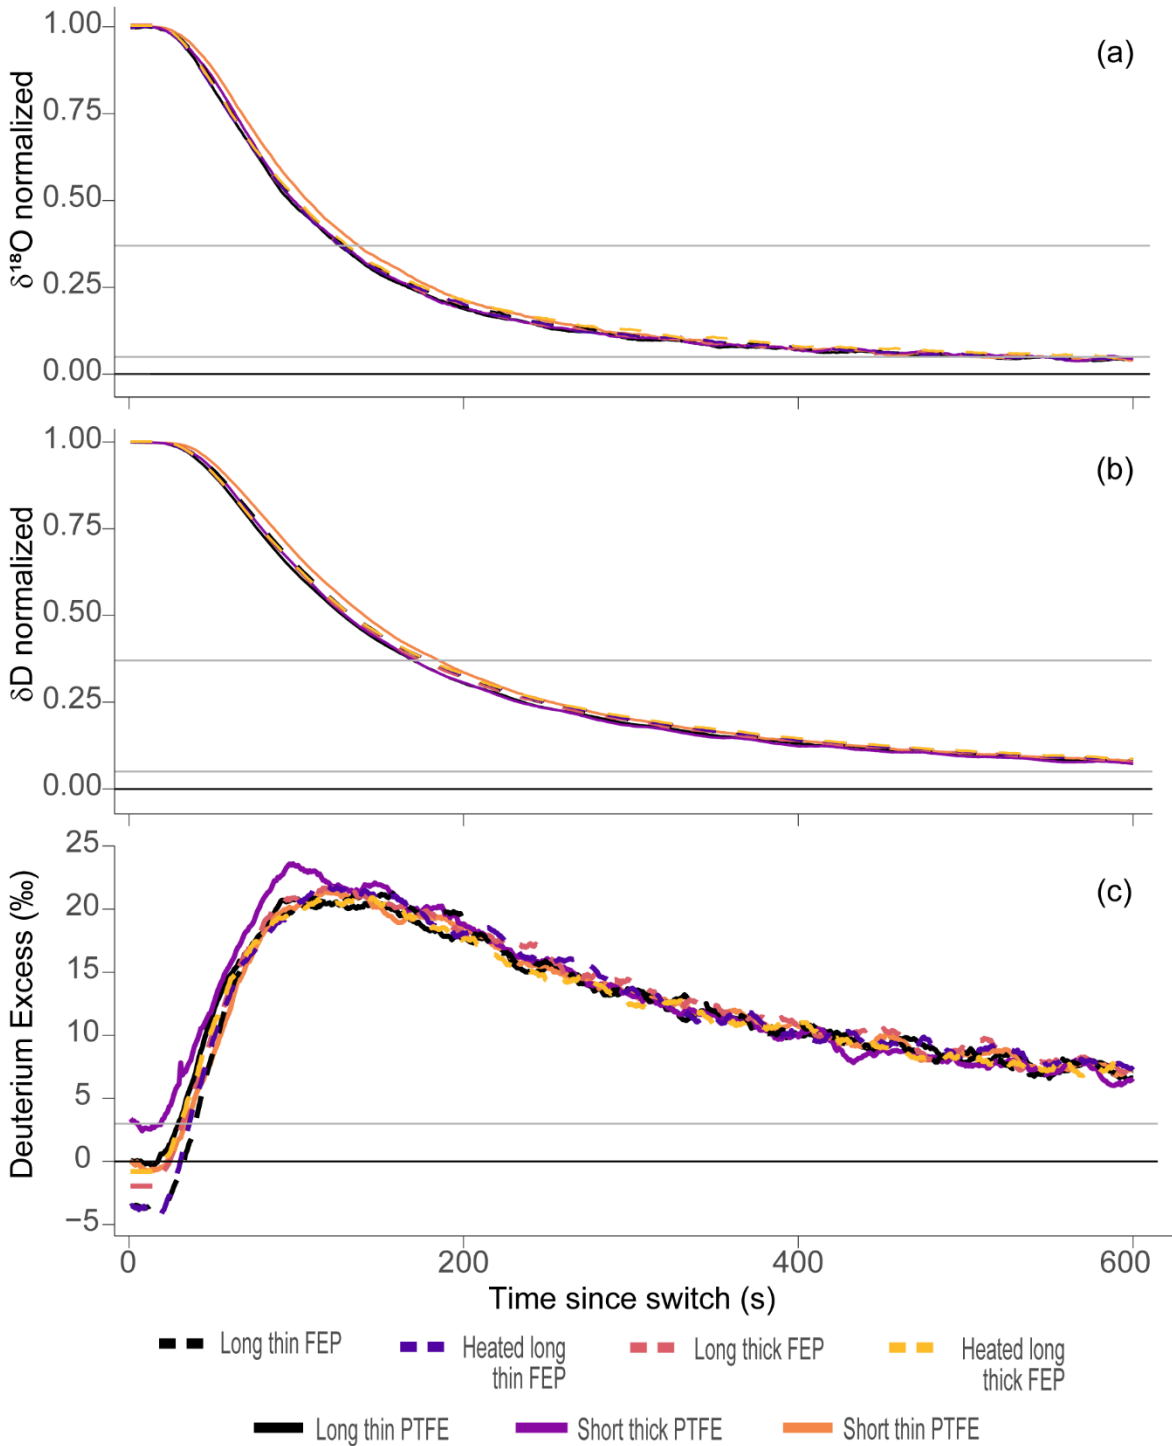

**Figure S3.** Mean attenuation curves for enriched-to-depleted transitions comparing thin- and thick-walled tubing for  $\delta^{18}\text{O}$  (a),  $\delta\text{D}$  (b), and D-excess (c) plotted over the first 600 s after source switch. Solid lines indicate PTFE tubing, while dotted indicate FEP. The thin-walled long tubing types are black in color. To compensate for small differences in isotopic values between experiments,  $\delta\text{D}$  and  $\delta^{18}\text{O}$  are normalized from 0–1 with zero at the start of the source

switch and 1 at the final value after 1 hour, and D-excess is adjusted to end at 0‰ for each experiment. Gray horizontal lines indicate thresholds of 95% and 63% transition completion for  $\delta D$  and  $\delta^{18}O$ , and 3‰ for D-excess, while a black line indicates 100% completion for all isotopes. Short and/or thick-walled tubing lengths have been lag adjusted to their long and/or thin-walled counterparts. The rate of isotopic equilibrium appears insensitive to the length of the tubing or the surface area to volume ratio under these conditions.

45 **S5. Non-replicated switching test with and without Omega mass flow meter**

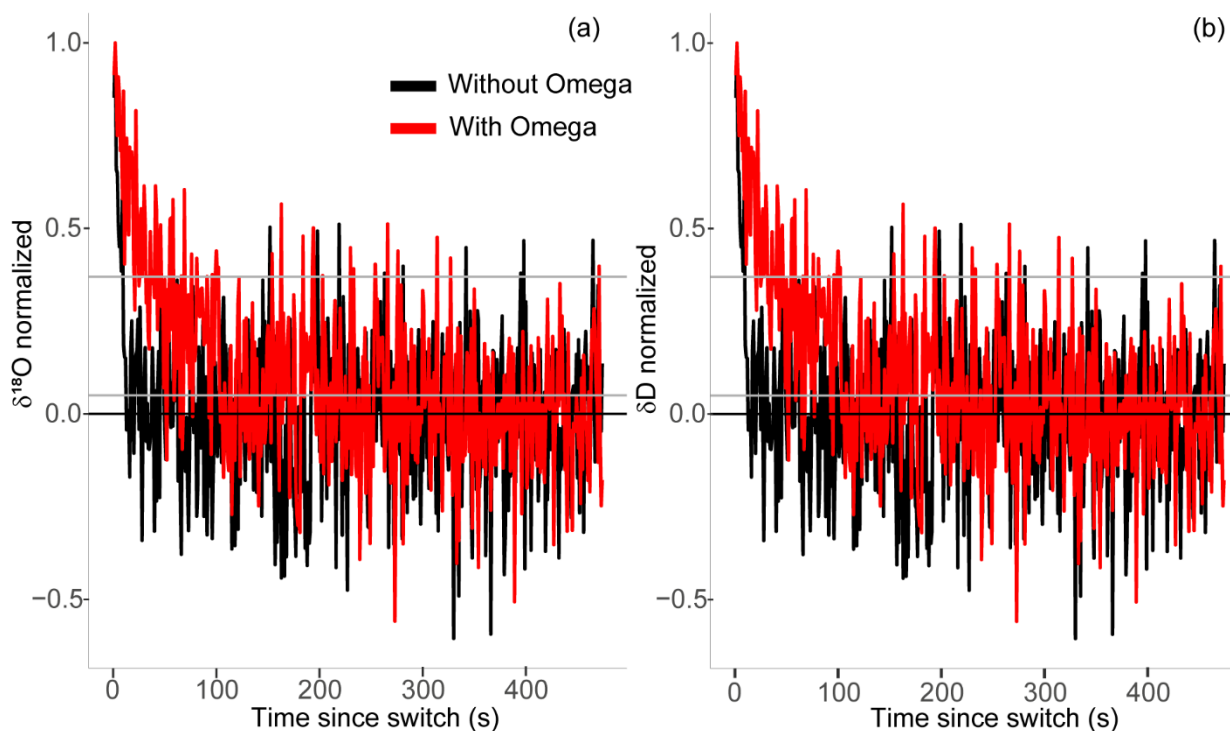

**Figure S4.** Enriched-to-depleted transition for one replicate with (red lines) and without (black lines) the Omega mass flow meter for  $\delta^{18}O$  (a) and  $\delta D$  (b) plotted as time after inclusion/removal of the meter. Data workup was similar to all other experiments, except using 1 Hz data with no running mean, the maximum delta value, and the average minimum delta of 400–474 seconds. The Omega slows the total sweepout time.
